# Supplementary material for: Two sulfur and nitrogen-rich cobalt–thiacalix[4]arene compounds for the selective mercury removal from aqueous solutions
Source: Royal Society of Chemistry journal article supplement (doi:10.1039/d0ce01209b), 2020-01-01
Supplement: d0ce01209b1.pdf [file d0ce01209b1.pdf]

**Two Sulfur and Nitrogen-rich Cobalt-Thiacalix[4]arene Compounds for  
Selective Mercury Removal from Aqueous Solution**

KaiyueLi,<sup>a, b</sup>Wuping Liao<sup>\*a, b, c</sup>

<sup>a</sup> State Key Laboratory of Rare Earth Resource Utilization, ERC for the Separation and Purification of REs and Thorium, Changchun Institute of Applied Chemistry, Chinese Academy of Sciences, Changchun 130022, China.

<sup>b</sup> University of Science and Technology of China, Hefei, 230026, China.

<sup>c</sup>Institute of Rare Earths, Chinese Academy of Sciences, Ganzhou 341000, China.

## I. Experimental Section

### Materials and General Methods.

*p*-*tert*-Butylthiacalix[4]arene (H<sub>4</sub>TC4A) was synthesized by literature method[1] and other reagents were purchased from commercial sources without further purification. Single crystal diffraction measurements were performed using a Bruker D8 QUEST system with Cu-K $\alpha$  radiation ( $\lambda = 1.54178\text{\AA}$ ). FT-IR spectra using KBr pellets were taken on a Bruker Vertex 70S spectrometer. TGA was performed on a NETZSCH STA449F3. Elemental analysis for C, H, N was recorded on a VarioEL instrument. Magnetic susceptibility measurement was performed on a Quantum Design MPMS XL-5 SQUID system in the temperature range of 2-300 K and diamagnetic corrections for the sample and sample holder were applied. N<sub>2</sub> adsorption and H<sub>2</sub> adsorption measurement were performed on a Micromeritics ASAP 2020 machine. X-ray photoelectron spectroscopy (XPS) measurements were carried out on a VG Thermo ESCALAB 250 spectrometer (VG Scientific) operated at 120 W. The composition of the products was obtained by using an inductively coupled plasma-optical emission spectrometer (ICP-OES, PerkinElmer Optimal 8000). The pH value of the aqueous phase is measured by PHS-3C acidometer.

### Synthesis of compounds CIAC-131 and CIAC-251.

**Synthesis of compound  $\{[Co_4(TC4A)(SO_4)]_6(L)_6(HCOO)_6\}^{12-}$  (CIAC-131).** Pink bulk crystals were obtained from solvothermal reaction of the mixture of *p*-*tert*-butylthiacalix[4]arene (H<sub>4</sub>TC4A, 0.037 g, 0.05mmol), CoSO<sub>4</sub>·7H<sub>2</sub>O (0.05 g, 0.18mmol), 1*H*-1,2,3-triazole-4,5-dicarboxylic acid (L, 0.025 g, 0.16mmol), CH<sub>3</sub>OH (5.5 ml), DMF (0.5 ml), triethylamine (several drops) in a 20 ml Teflon-lined autoclave which was kept at 130 °C for 3 days and then slowly cooled to 20 °C at 4 °C·h<sup>-1</sup>. The pink bulk crystals were isolated by filtration, which were washed by CH<sub>3</sub>OH and then dried in air. Yield: ca. 80% based on H<sub>4</sub>TC4A. Elemental analysis (%) for C<sub>342</sub>H<sub>450</sub>Co<sub>24</sub>N<sub>30</sub>O<sub>84</sub>S<sub>30</sub> (including 12(C<sub>2</sub>H<sub>5</sub>)<sub>3</sub>NH<sup>+</sup> counter cations, excluding the disordered solvents): calculated C 47.21, H 5.21, N 4.83; found (after drying in vacuum) C 47.93, H 5.30, N 4.95.

**Synthesis of compound  $\{[Co_4(TC4A)_2]_2L\}^{3-}$  (CIAC-251).** Green bulk crystals were synthesized by a similar procedure as **CIAC-131** except  $CoSO_4 \cdot 7H_2O$  was replaced with  $CoCl_2 \cdot 6H_2O$  (0.05 g, 0.21mmol). The green bulk crystals were isolated by filtration, which were washed by  $CH_3OH$  and then dried in air. Yield: ca. 50% based on  $H_4TC4A$ . Elemental analysis (%) for  $C_{182}H_{221}Co_8N_6O_{20}S_{16}$  (including  $3(C_2H_5)_3NH^+$  counter cations, excluding the disordered solvents): calculated C 57.57, H 5.87, N 2.21; found (after drying in vacuum) C 57.65, H 5.96, N 2.33.

### Adsorption experiments of Hg(II)

$$q_e = \frac{(C_i - C_e)V}{m} \quad (1)$$

$$q_t = \frac{(C_i - C_t)V}{m} \quad (2)$$

$$R = \frac{(C_i - C_e)}{C_i} \times 100\% \quad (3)$$

Where  $C_e$  (mg/L),  $C_t$  (mg/L) and  $C_i$  (mg/L) represent the metal concentrations at equilibrium,  $t$  time and the beginning (or before mixing), respectively. And  $q_e$  (mg/g) and  $q_t$  (mg/g) represent the amount of adsorbed metal ions at equilibrium and  $t$  time, respectively.  $R$  is removal rate/efficiency of metal ions.  $V$  (L) is the volume of test solutions and  $m$  (mg) is the amount of adsorbent.

### Langmuir isotherm models

The Langmuir adsorption model was further employed to study the equilibrium adsorption isotherm, the adsorption capacity of **CIAC-131** and **CIAC-251** were calculated by the equation:

$$\frac{C_e}{q_e} = \frac{1}{q_m k_L} + \frac{C_e}{q_m} \quad (4)$$

Where  $C_e$  (mg/L) and  $q_e$  (mg/g) represent the concentration and adsorption amount of Hg(II) at equilibrium, respectively.  $q_m$  (mg/g) is the adsorption capacity (mg/g), while

$k_L$  is the Langmuir constant (L/mg).

### **Pseudo-Second-Order Kinetic models**

$$\frac{t}{q_t} = \frac{t}{q_e} + \frac{1}{k_2 q_e^2} \quad (5)$$

Where  $q_t$  (mg/g) and  $q_e$  (mg/g) represent the adsorption amounts at  $t$  time and equilibrium, respectively, while  $k_2$  (g mg<sup>-1</sup> min<sup>-1</sup>) is the rate constant.

**Pretreatment sample.** Obtained sample from mother liquor was dry at 70 °C for 5min.

**Effect of pH.** The effect of pH values from 1 to 6.5 (the pH value of water measured by PHS-3C acidometer) for the removal of mercury ions was studied. The samples of **CIAC-131** (5 mg) or **CIAC-251** (5 mg) were respectively put into the aqueous solution of Hg(II) with an initial concentration of 100 mg/L (5 mL) and stirred at 400 rpm at room temperature for 4 h. And then the solid samples were separated via the centrifuge and the residual concentration of Hg(II) was determined by ICP-OES.

**Selective Adsorption.** The samples of **CIAC-131** (5 mg) or **CIAC-251** (5 mg) were dispersed in a pH = 6 aqueous solution containing Hg(II) (50 mg/L) and other coexisting metal ions Mg(II), Ca(II), Mn(II), Co(II), Ni(II), Cu(II), Zn(II), Cd(II) and Pb(II) (50 mg/L), stirred at 400 rpm at room temperature for 4 h. And then the solid samples were separated via the centrifuge and the residual concentrations of the metal ions were determined by ICP-OES.

**Adsorption isotherms.** The samples of **CIAC-131** (5 mg) and **CIAC-251** (5 mg) were immersed into HgCl<sub>2</sub> aqueous solution (pH= 6) with the concentration range of 50-950 mg/L (5 mL) and stirred at 400 rpm at room temperature for 4 h. After saturated adsorption, the solid samples of **CIAC-131-Hg** or **CIAC-251-Hg** were separated via the centrifuge and the residual concentration of Hg(II) was determined by ICP-OES.

**Adsorption kinetics measurements.** The samples of **CIAC-131** (5 mg) were immersed into HgCl<sub>2</sub> aqueous solution (pH= 6) with an initial concentration of 50 mg/L (5 mL), stirred at 400 rpm at room temperature at a certain time interval, and

then separated via the centrifuge. The residual concentration of Hg(II) was determined by ICP-OES.

**Control experiment.** The mass of H<sub>4</sub>TC4A and **L** were equivalent to the amount of H<sub>4</sub>TC4A and **L** in 5 mg samples of **CIAC-131**. The same adsorption experiment was performed. That is, the samples of H<sub>4</sub>TC4A and **L** were immersed into the aqueous solution with 550 mg/L HgCl<sub>2</sub> (5 mL) and stirred at 400 rpm at room temperature for 4 h. After adsorption, the solid samples were separated via the centrifuge and the residual concentration of Hg(II) was determined by ICP-OES.

## II. Crystallographic Analysis

The single crystal diffraction data of **CIAC-131** and **CIAC-251** were collected on a Bruker D8 QUEST system with a Cu-K $\alpha$  radiation ( $\lambda = 1.54178 \text{ \AA}$ ). The direct method was chosen to solve the crystal structures, and the refinement was performed with full-matrix least-squares on  $F^2$  using the reported SHELXL-2017 program[2]. The “SQUEEZE” method from the PLATON package was applied to subtract the electronic density of the solvent molecules from the crystal structure. The hydrogen atoms were generated theoretically and refined isotropically with fixed thermal factors. All non-hydrogen atoms except the disordered butyl groups were refined anisotropically. The molecular formula shown in this paper did not include the unidentified counter ions and solvent molecules. After the final refinement, the  $R$  factors were still relatively large, which should be due to the weak diffraction even at 190 K. The crystal data and refinement details are given in Table S1. The number CCDC2024025-2024026 have been assigned for **CIAC-131** and **CIAC-251**. The data can be obtained free of charge from The Cambridge Crystallographic Data Centre via <http://www.ccdc.cam.ac.uk>.

**Table S1.** Crystal data and structure refinement for compounds **CIAC-131** and **CIAC-251**.

|                                                                   | <b>CIAC-131</b>                                                                                    | <b>CIAC-251</b>                                                                                  |
|-------------------------------------------------------------------|----------------------------------------------------------------------------------------------------|--------------------------------------------------------------------------------------------------|
| Formula                                                           | C <sub>270</sub> H <sub>270</sub> Co <sub>24</sub> N <sub>18</sub> O <sub>84</sub> S <sub>30</sub> | C <sub>164</sub> H <sub>176</sub> Co <sub>8</sub> N <sub>3</sub> O <sub>20</sub> S <sub>16</sub> |
| Formula wt.                                                       | 7487.14                                                                                            | 3493.47                                                                                          |
| T/K                                                               | 190(2)                                                                                             | 200(2) K                                                                                         |
| Cryst. syst.                                                      | Trigonal                                                                                           | Trigonal                                                                                         |
| Space group                                                       | R-3                                                                                                | R-3c                                                                                             |
| a (Å)                                                             | 36.5063(13)                                                                                        | 49.4477(9)                                                                                       |
| b (Å)                                                             | 36.5063(13)                                                                                        | 49.4477(9)                                                                                       |
| c (Å)                                                             | 28.7488(11)                                                                                        | 39.5019(10)                                                                                      |
| $\alpha$ (°)                                                      | 90                                                                                                 | 90                                                                                               |
| $\beta$ (°)                                                       | 90                                                                                                 | 90                                                                                               |
| $\gamma$ (°)                                                      | 120                                                                                                | 120                                                                                              |
| V (Å <sup>3</sup> )                                               | 33181(3)                                                                                           | 83645(4)                                                                                         |
| Z                                                                 | 3                                                                                                  | 18                                                                                               |
| D <sub>c</sub> /g cm <sup>-3</sup>                                | 1.124                                                                                              | 1.248                                                                                            |
| $\mu$ /mm <sup>-1</sup>                                           | 8.642                                                                                              | 7.579                                                                                            |
| F(000)                                                            | 11448                                                                                              | 32634                                                                                            |
| Tot. data                                                         | 31629                                                                                              | 117644                                                                                           |
| Uniq. Data                                                        | 3491                                                                                               | 6451                                                                                             |
| R <sub>int</sub>                                                  | 0.1522                                                                                             | 0.1337                                                                                           |
| GOF                                                               | 1.292                                                                                              | 1.086                                                                                            |
| R <sub>1</sub> <sup>a</sup> [ <i>I</i> > 2 $\sigma$ ( <i>I</i> )] | 0.1198                                                                                             | 0.0658                                                                                           |
| wR <sub>2</sub> <sup>b</sup> (all data)                           | 0.3424                                                                                             | 0.1884                                                                                           |

$$^a R_1 = \sum ||F_o| - |F_c|| / \sum |F_o|; ^b wR_2 = \{ \sum [w(F_o^2 - F_c^2)_2] / \sum [w(F_o^2)^2] \}^{1/2}.$$

### VOIDOO Calculations[3].

In order to determine the size of the inner cavity of  $\{\text{Co}_{24}\}$ , VOIDOO calculations based on the crystal structure were performed. When the virtual probe with a radius of 1.4 Å (set by default, water-sized) was employed, there was no effective cavity in the structure. When the probe size was reduced to 1.0 Å, the volume of the cavity is about 165 Å<sup>3</sup> (Fig. S1a). If the internal sulfates were excluded, the volume of the cavity increases to 473 Å<sup>3</sup>(Fig. S1b).

The following parameters were changed from their default settings:

Maximum number of volume-refinement cycles: 30

Minimum size of secondary grid: 3

Grid for plot files: 0.1

Primary grid spacing: 0.1

Plot grid spacing: 0.1

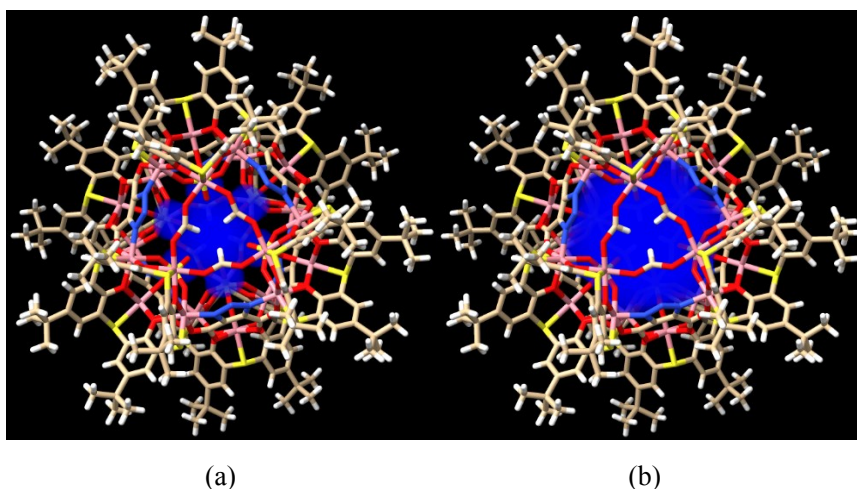

**Fig. S1.** VOIDOO-calculated void space as shown within the crystal structure of **CIAC-131**. (a) including  $\text{SO}_4^{2-}$ ; (b) excluding  $\text{SO}_4^{2-}$ .

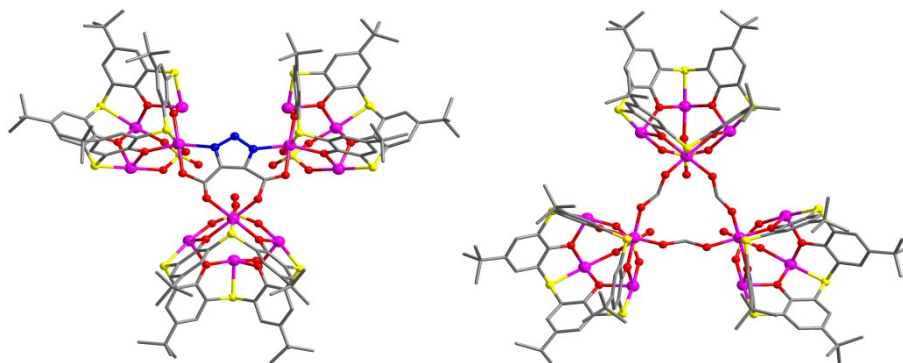

**Fig. S2.**The connection of Lligand and formate anion with SBUs in **CIAC-131**.

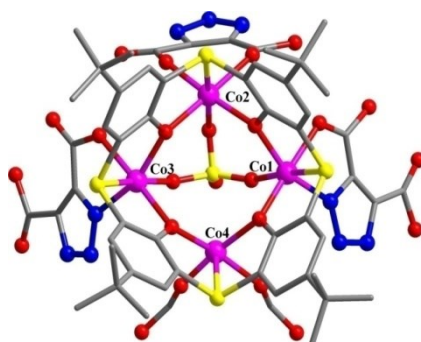

**Fig. S3.**The coordination of the Co sites in shuttlecock-like Co<sub>4</sub>-TC4A SBU in **CIAC-131**.

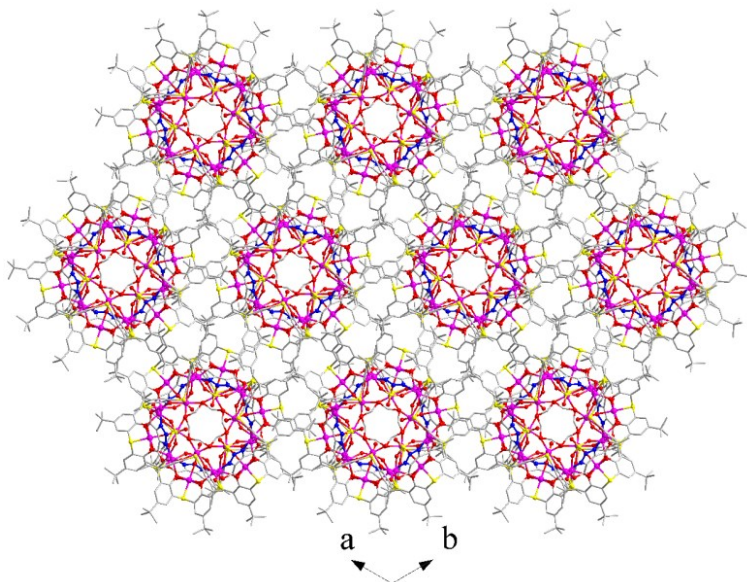

**Fig.S4.** Packing diagram viewed along the *c* axis of compound **CIAC-131**.



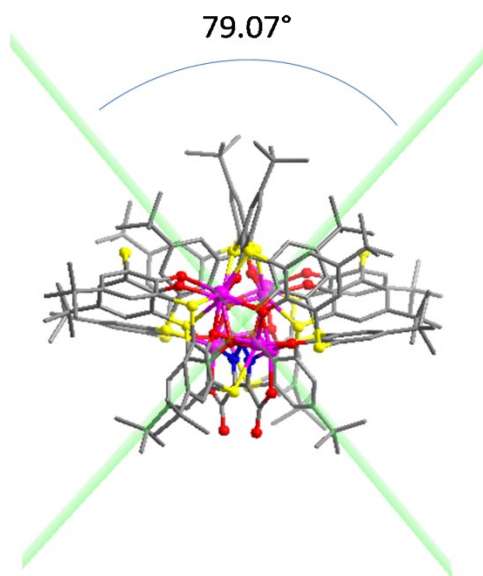

**Fig. S5.** The dihedral angle between the plates through two Co<sub>4</sub> cores of **CIAC-251**.

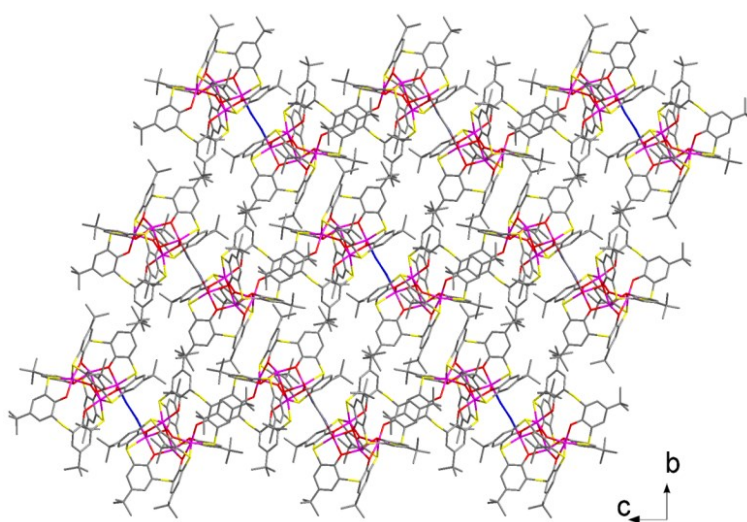

**Fig.S6.** Packing diagram viewed along the *c* axis of compound **CIAC-251**.

### III. Bond valence sum calculations

Table S2-1. BVS for the Co1 atom in CIAC-131.

|     |     | Dist  | R     | B    | BVal     |
|-----|-----|-------|-------|------|----------|
| Co1 | O1  | 2.136 | 1.692 | 0.37 | 0.301    |
| Co1 | O2  | 2.076 | 1.692 | 0.37 | 0.354    |
| Co1 | O5  | 2.063 | 1.692 | 0.37 | 0.367    |
| Co1 | O12 | 2.106 | 1.692 | 0.37 | 0.327    |
| Co1 | S1  | 2.428 | 2.06  | 0.37 | 0.370    |
| Co1 | N3  | 2.042 | 1.84  | 0.37 | 0.579    |
|     |     |       |       |      | Sum2.298 |

Table S2-2. BVS for the Co2 atom in CIAC-131.

|     |     | Dist  | R     | B    | BVal     |
|-----|-----|-------|-------|------|----------|
| Co2 | O2  | 2.124 | 1.692 | 0.37 | 0.311    |
| Co2 | O3  | 2.111 | 1.692 | 0.37 | 0.322    |
| Co2 | O6  | 2.072 | 1.692 | 0.37 | 0.358    |
| Co2 | O9  | 2.062 | 1.692 | 0.37 | 0.368    |
| Co2 | O11 | 2.090 | 1.692 | 0.37 | 0.341    |
| Co2 | S2  | 2.420 | 2.06  | 0.37 | 0.378    |
|     |     |       |       |      | Sum2.078 |

Table S2-3. BVS for the Co3 atom in CIAC-131.

|     |     | Dist  | R     | B    | BVal     |
|-----|-----|-------|-------|------|----------|
| Co3 | O3  | 2.046 | 1.692 | 0.37 | 0.384    |
| Co3 | O4  | 2.011 | 1.692 | 0.37 | 0.422    |
| Co3 | O7  | 2.023 | 1.692 | 0.37 | 0.409    |
| Co3 | O10 | 2.171 | 1.692 | 0.37 | 0.274    |
| Co3 | S3  | 2.461 | 2.06  | 0.37 | 0.338    |
| Co3 | N1  | 2.072 | 1.84  | 0.37 | 0.534    |
|     |     |       |       |      | Sum2.361 |

Table S2-4. BVS for the Co4 atom in CIAC-131.

|     |     | Dist  | R     | B    | BVal    |
|-----|-----|-------|-------|------|---------|
| Co4 | O1  | 1.974 | 1.692 | 0.37 | 0.467   |
| Co4 | O4  | 2.075 | 1.692 | 0.37 | 0.355   |
| Co4 | O13 | 1.933 | 1.692 | 0.37 | 0.521   |
| Co4 | O14 | 1.992 | 1.692 | 0.37 | 0.444   |
| Co4 | S4  | 2.468 | 2.06  | 0.37 | 0.332   |
|     |     |       |       |      | Sum2.11 |
|     |     |       |       |      | 9       |

**Table S3-1.** BVS for the Co1 atom in **CIAC-251**.

|     |    | Dist  | R     | B    | BVal             |
|-----|----|-------|-------|------|------------------|
| Co1 | O1 | 2.155 | 1.692 | 0.37 | 0.286            |
| Co1 | O4 | 2.064 | 1.692 | 0.37 | 0.366            |
| Co1 | O5 | 1.999 | 1.692 | 0.37 | 0.436            |
| Co1 | O8 | 2.005 | 1.692 | 0.37 | 0.375            |
| Co1 | S4 | 2.432 | 2.06  | 0.37 | 0.366            |
| Co1 | S8 | 2.533 | 2.06  | 0.37 | 0.278            |
|     |    |       |       |      | Sum <b>2.107</b> |

**Table S3-2.** BVS for the Co2 atom in **CIAC-251**.

|     |    | Dist  | R     | B    | BVal             |
|-----|----|-------|-------|------|------------------|
| Co2 | O1 | 2.036 | 1.692 | 0.37 | 0.394            |
| Co2 | O2 | 1.967 | 1.692 | 0.37 | 0.476            |
| Co2 | O6 | 2.099 | 1.692 | 0.37 | 0.333            |
| Co2 | O7 | 2.188 | 1.692 | 0.37 | 0.262            |
| Co2 | S1 | 2.490 | 2.06  | 0.37 | 0.313            |
| Co2 | S6 | 2.511 | 2.06  | 0.37 | 0.296            |
|     |    |       |       |      | Sum <b>2.074</b> |

**Table S3-3.** BVS for the Co3 atom in **CIAC-251**.

|     |    | Dist  | R     | B    | BVal             |
|-----|----|-------|-------|------|------------------|
| Co3 | O3 | 2.024 | 1.692 | 0.37 | 0.408            |
| Co3 | O4 | 2.014 | 1.692 | 0.37 | 0.419            |
| Co3 | O7 | 2.067 | 1.692 | 0.37 | 0.363            |
| Co3 | O8 | 2.134 | 1.692 | 0.37 | 0.303            |
| Co3 | S7 | 2.519 | 2.06  | 0.37 | 0.289            |
|     |    |       |       |      | Sum <b>1.782</b> |

**Table S3-4.** BVS for the Co4 atom in **CIAC-251**.

|     |    | Dist  | R     | B    | BVal  |
|-----|----|-------|-------|------|-------|
| Co4 | O2 | 1.989 | 1.692 | 0.37 | 0.448 |
| Co4 | O3 | 1.999 | 1.692 | 0.37 | 0.436 |
| Co4 | O7 | 2.252 | 1.692 | 0.37 | 0.220 |
| Co4 | O9 | 2.049 | 1.692 | 0.37 | 0.381 |
| Co4 | S2 | 2.464 | 2.06  | 0.37 | 0.336 |
| Co4 | N1 | 2.031 | 1.84  | 0.37 | 0.597 |

#### IV. Magnetic Studies.

The magnetic properties of compounds **CIAC-131** and **CIAC-251**, measured in an applied field of 1000 Oe at 2-300 K, is shown in Fig.S7. The  $\chi_M T$  values at room temperature are  $66.8 \text{ cm}^3 \text{ mol}^{-1} \text{ K}$  and  $21.8 \text{ cm}^3 \text{ mol}^{-1} \text{ K}$  for **CIAC-131** and **CIAC-251**, respectively. Both decrease gradually first and then fall rapidly in the lower temperature region to  $2.03 \text{ cm}^3 \text{ mol}^{-1} \text{ K}$  and  $4.05 \text{ cm}^3 \text{ mol}^{-1} \text{ K}$  at 2 K. For each Co(II) center of **CIAC-131** and **CIAC-251**, the experimental  $\chi_M T$  value at room temperature are  $2.78 \text{ cm}^3 \text{ mol}^{-1} \text{ K}$  and  $2.73 \text{ cm}^3 \text{ mol}^{-1} \text{ K}$ , which are accord with the typical value of the Co(II) (the  $\chi_M T$  value normally ranges from 2.7 to 3.4  $\text{cm}^3 \text{ mol}^{-1} \text{ K}$  for Co(II)). For these two compounds **CIAC-131** and **CIAC-251**, fitting the experimental data in the range of 50-300 K to the Curie-Weiss law of  $1/\chi_M = (T - \theta)/C$  with Curie constant ( $C$ ) of  $78.62 \text{ cm}^3 \text{ mol}^{-1} \text{ K}$  and  $24.65 \text{ cm}^3 \text{ mol}^{-1} \text{ K}$ , and Weiss constant ( $\theta$ ) of  $-52.99 \text{ K}$  and  $-37.85 \text{ K}$ , respectively. The negative Weiss constant ( $\theta$ ) value suggest antiferromagnetic interaction between the Co(II) centers[4].

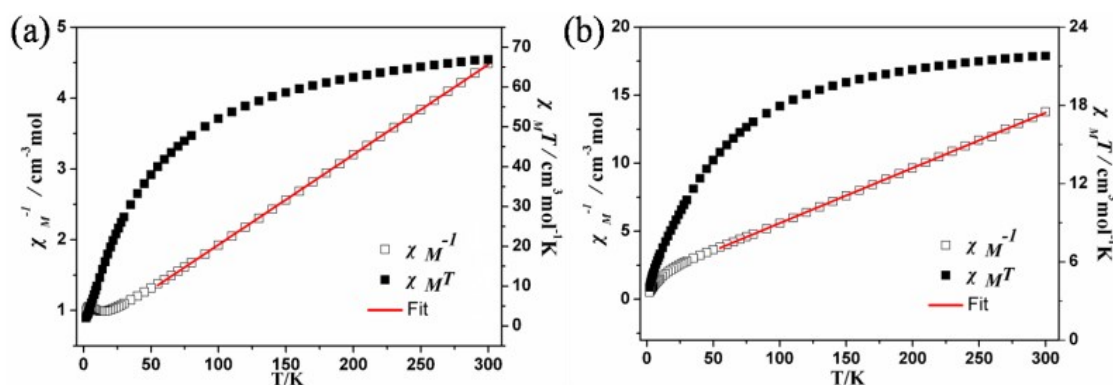

**Fig.S7.** Plots of  $\chi_M T$  vs.  $T$  and  $1/\chi_M$  vs.  $T$  for **CIAC-131**(a) and **CIAC-251**(b) in a 1000 Oe field at 2-300 K.

## V. pH Effect on Hg(II) adsorption

The effect of pH on Hg(II) adsorption by **CIAC-131** and **CIAC-251** were investigated. As shown in Fig. S8, the removal efficiency of Hg(II) by **CIAC-131** and **CIAC-251** are 97.5% and 77.5%, respectively. That is, {Co<sub>24</sub>} cage has better adsorption performance towards Hg(II) than {Co<sub>8</sub>} cluster. When pH is less than 2, the removal efficiency are not high for both adsorbents because there are a lot of hydrogen ions in the aqueous solution which would compete with Hg(II) to bond the binding sites on the adsorbent surface [5] and the high acidity of the aqueous solution would lead to the partial collapse of **CIAC-131** and **CIAC-251** skeleton. The removal efficiency increase continuously when pH = 3 ~ 6, which is due to the less and less hydrogen ions in the solution to compete with Hg(II) to be adsorbed. The removal efficiency reach the maximum at pH = 6. And then the removal efficiency of Hg(II) by **CIAC-131** decreased obviously with the increasing pH value while the decrease is not obvious for **CIAC-251**. And when pH > 6.47, mercury ions mainly exist as Hg(OH)<sub>2</sub> which cannot enter the cage cavity of **CIAC-131**.

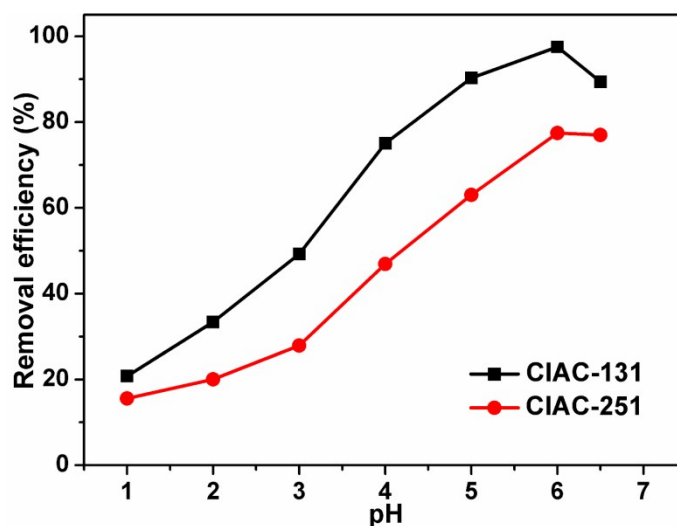

Fig.S8. Effect of pH on Hg(II) adsorption by **CIAC-131** and **CIAC-251**. ( $C_i = 100$  mg/L)

## VI. Selective Adsorption

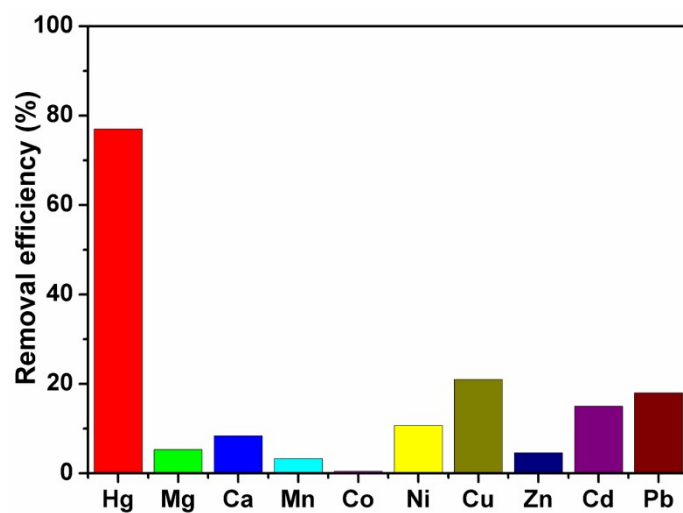

Fig. S9. Adsorption of different metal ions from a mixture solution by CIAC-251.

## VII. Adsorption isotherm

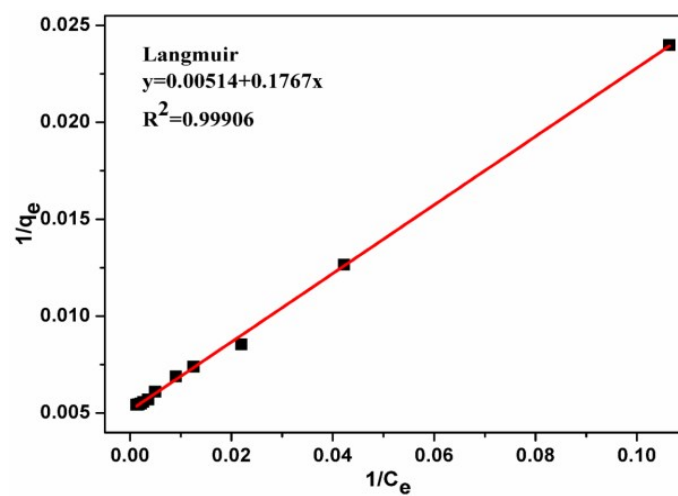

Fig. S10. The Langmuir plot for the Hg(II) adsorption of CIAC-251.

## VIII. FT-IR Spectra

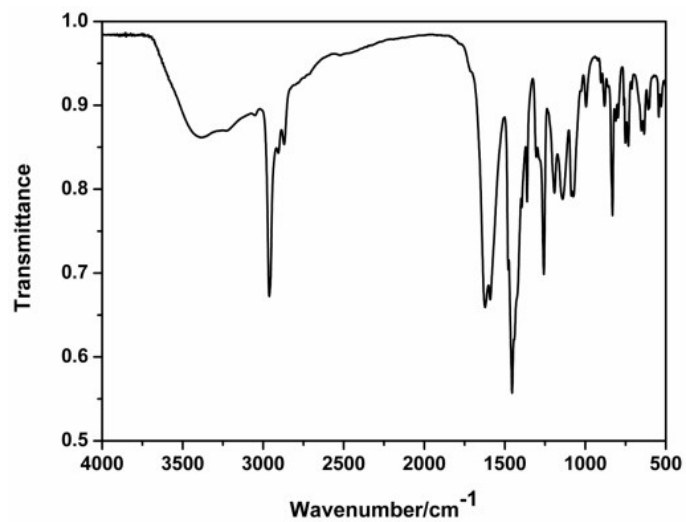

Fig. S11. FT-IR spectra of CIAC-131.

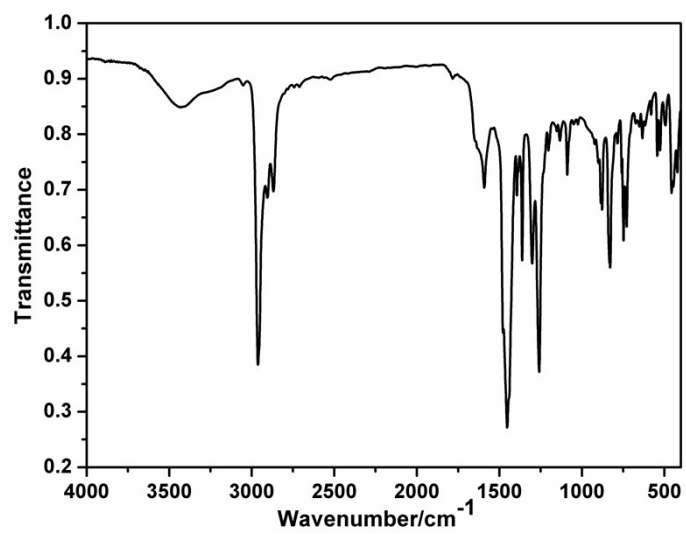

Fig. S12. FT-IR spectra of CIAC-251.

## IX. TG Analysis

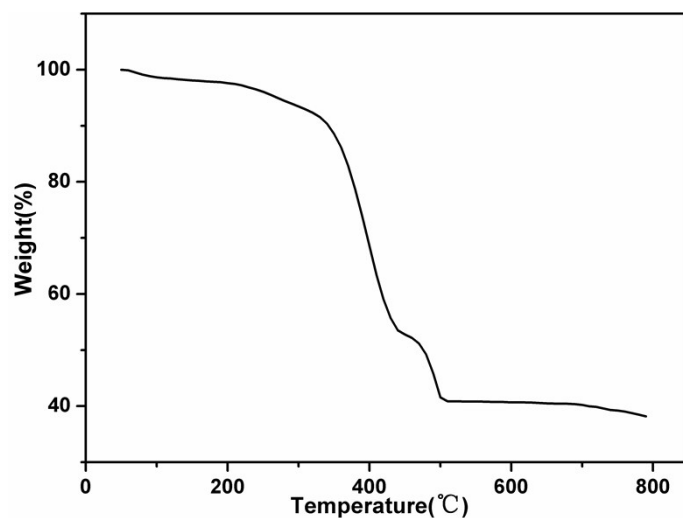

Fig. S13. TG curve of CIAC-131.

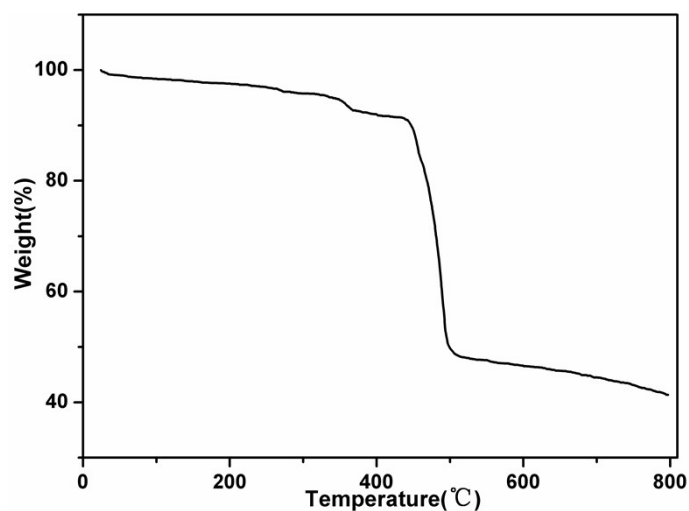

Fig. S14. TG curve of CIAC-251.

## X. References

- [1] N. Iki, C. Kabuto, T. Fukushima, H. Kumagai, H. Takeya, S. Miyanari, T. Miyashi, S. Miyano, *Tetrahedron*. 2000, **56**, 1437–1443.
- [2] G. M. Sheldrick, *Acta Crystallogr., Sect. C: Cryst. Struct. Commun.* 2015, **71**, 3-8.
- [3] G. J. Kleywegt, T. A. Jones, *Acta Crystallogr. D.* 1994, **50**, 178-185.
- [4] Y. F. Bi, X. T. Wang, W. P. Liao, X. F. Wang, X. W. Wang, H. J. Zhang, S. Gao, *J. Am. Chem. Soc.* 2009, **131**, 11650.
- [5] I. Mobasherpour, E. Salahi, M. Pazouki, *Desalination*. 2011, **266**, 142.
